# Supplementary material for: Ginger-derived nanoparticles protect against alcohol-induced liver damage
Source: PubMed Central journal article supplement — J Extracell Vesicles. 2015 Nov 25;4:10.3402/jev.v4.28713. doi: 10.3402/jev.v4.28713 (PMC4662062; doi:10.3402/jev.v4.28713), 2015-11-25
Supplement: JEV-4-28713-s001.pdf [file JEV-4-28713-s001.pdf]

## **Supplemental Figure legends**

**Supplementary Figure 1.** Blocking of primary hepatocyte uptake of PKH26 labeled GDN  
Primary hepatocytes were incubated for 3 h with the indicated chemical reagents or PBS as a control in the presence of PKH26 labeled GDN (a) or GDEN2 (b) (100  $\mu\text{g/ml}$ ). The treated cells were then washed, fixed, and cells were stained with anti-mouse albumin. PKH26+Albumin+ cells were detected using confocal microscopy and photographed. Results represent one of five independent experiments.

## **Supplementary Figure 2** Temperature depends uptake of GDN

24-h cultured mouse primary hepatocytes were incubated with PKH26 labeled GDN (100  $\mu\text{g/ml}$ ) or PBS as a control at 37°C, 20°C or 4°C for 6 h. The treated cells were then washed and fixed. PKH26+Albumin+ cells were detected using confocal microscopy and photographed. Results represent one of three independent experiments.

**Supplementary Figure 3.** Size distribution (left) and surface Zeta-potential (right) of the LN from GDEN1 lipids with Shogaol knock out and knock in were measured using a Zetasizer. Results represent one of five independent experiments.

Supplementary Figure 1

a

GDN

No Nanoparticle

PBS

Amiloride

Bafilomycin A1

Chlorpromazine

Cytochalasin D

Indomethacin

Nocodazole

PKH26

Albumin

DAPI

Merged

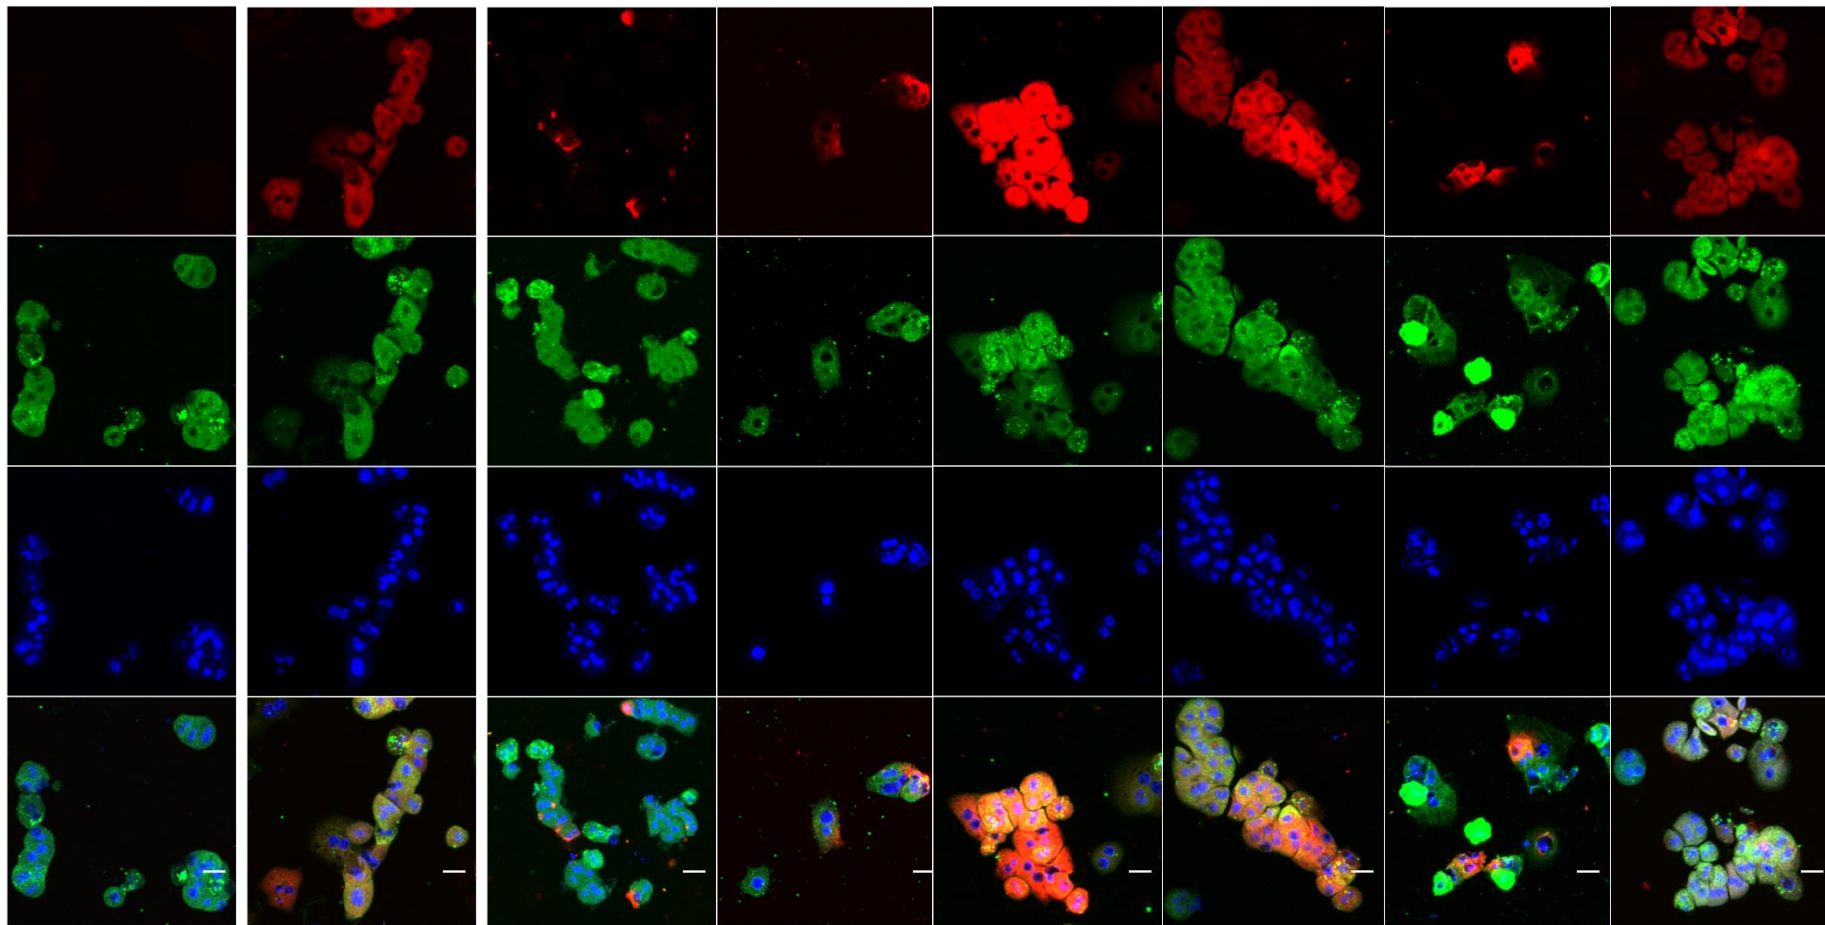

Supplementary Figure 1

b

GDEN2

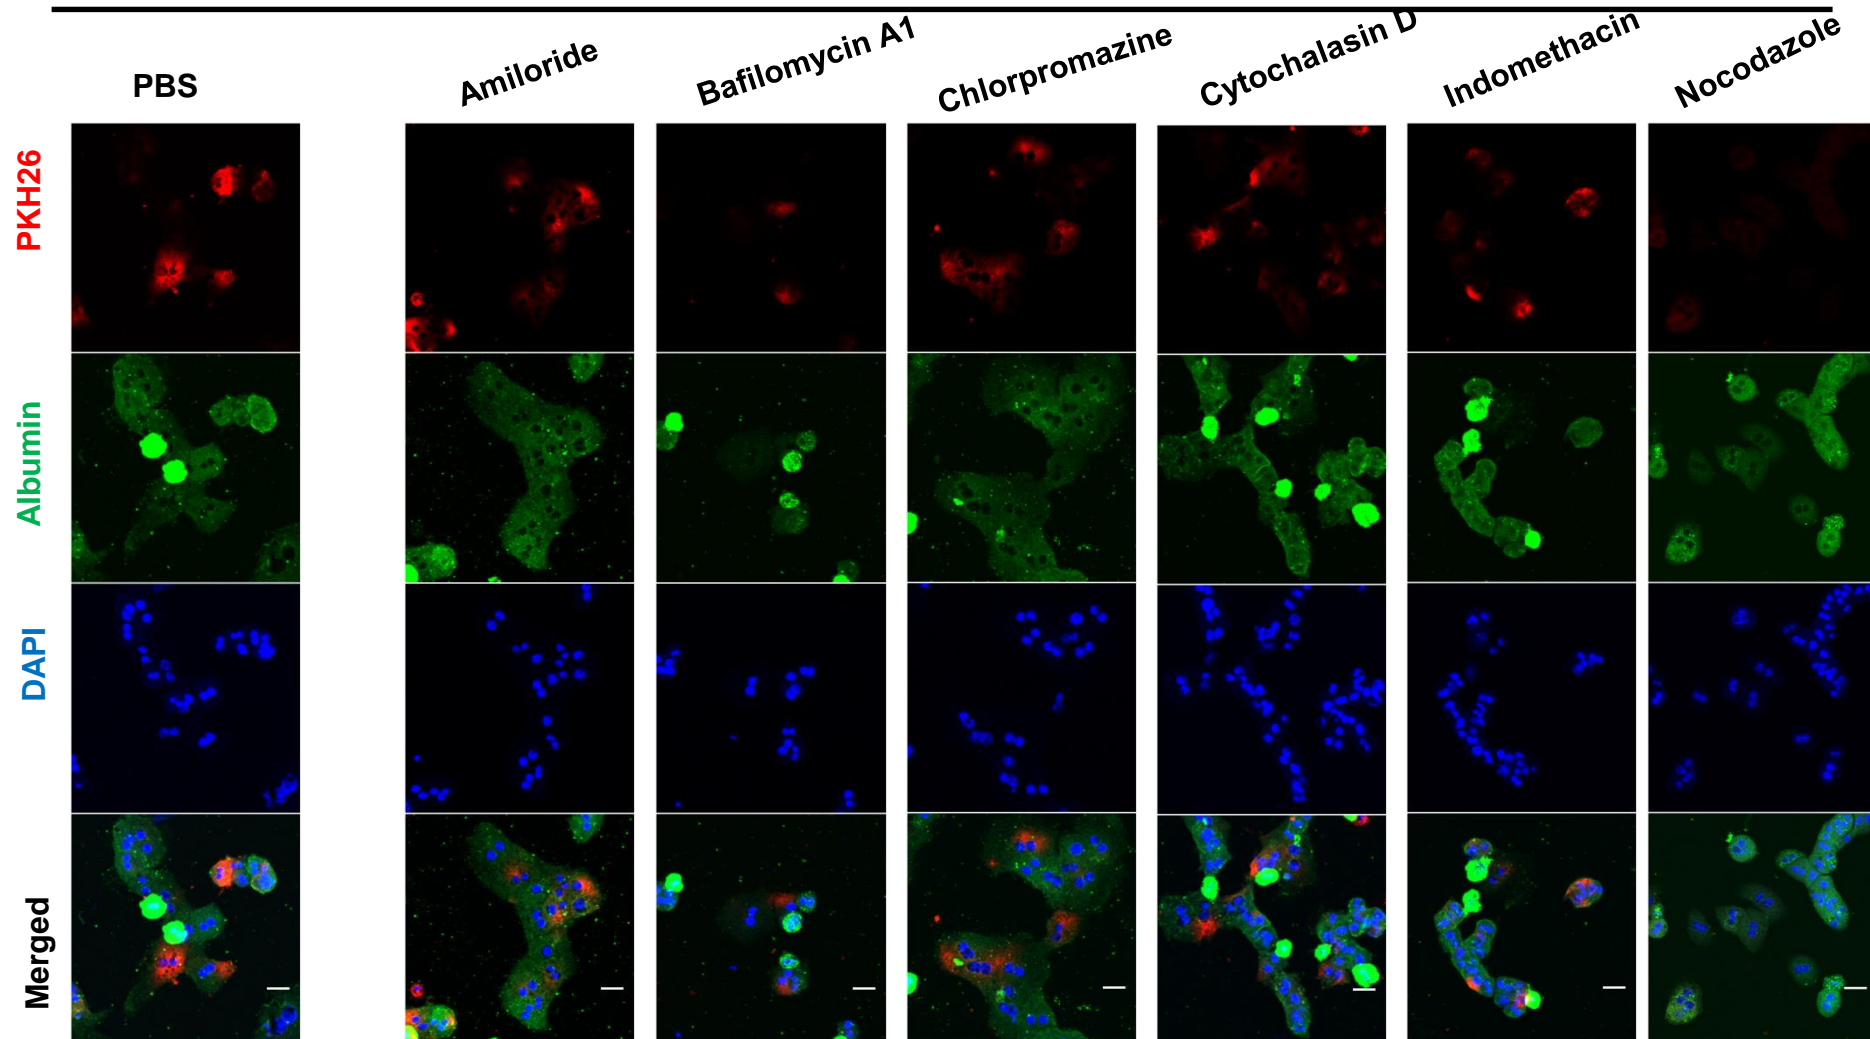

Supplementary Fig. 2

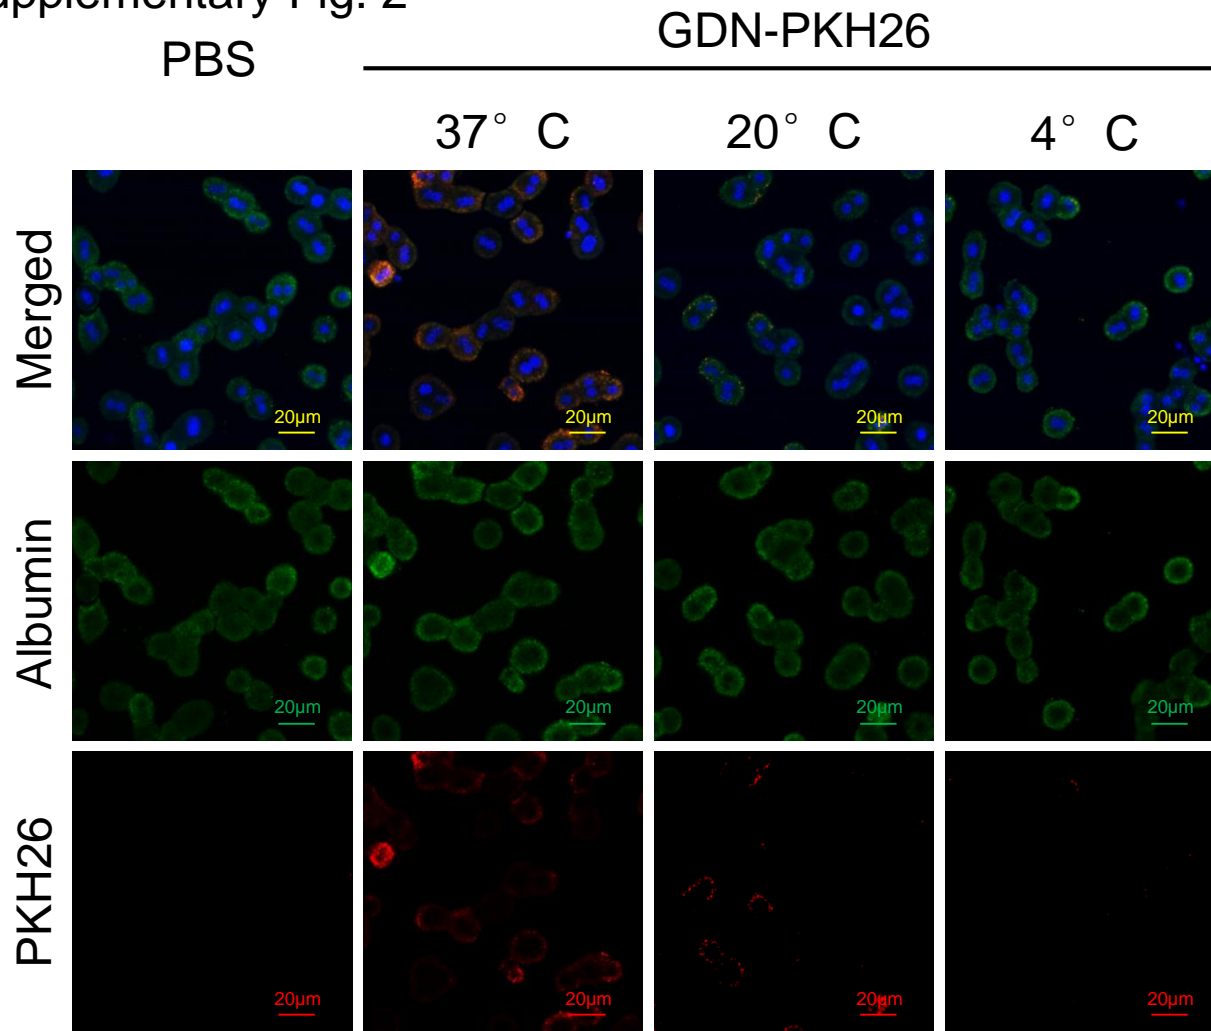

Supplementary Figure 3

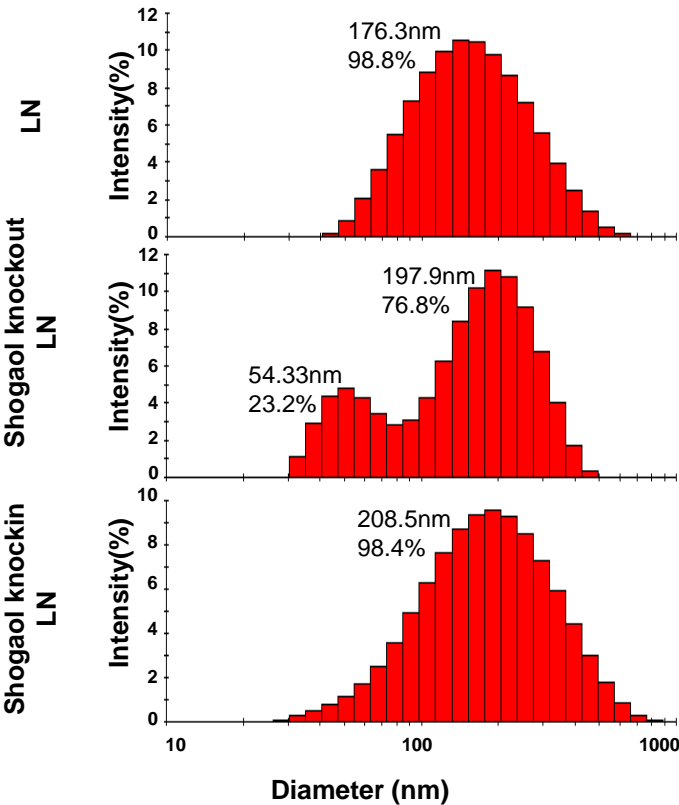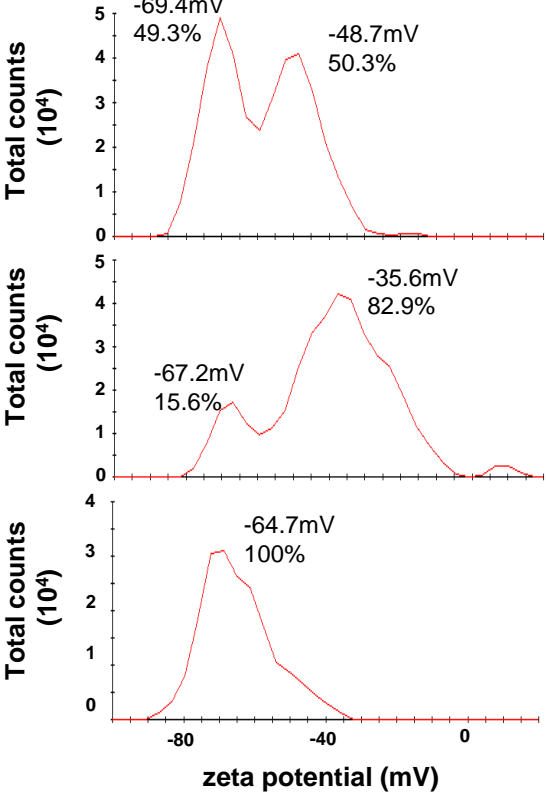

Supplementary Table 1 lipids in GDENs (ng/mg of dry GDENs)

| Lipid                    | GDN          | GDEN2        |
|--------------------------|--------------|--------------|
| DGDG                     | 0.353        | 0.084        |
| MGMG                     | 0.149        | 0.050        |
| PG                       | 0.003        | 0.001        |
| PC                       | 0.023        | 0.004        |
| PI                       | 0.010        | 0.005        |
| PS                       | 0.009        | 0.005        |
| PA                       | 0.327        | 0.103        |
| PE                       | 0.006        | 0.002        |
| LysoPG                   | 0.001        | 0.001        |
| LysoPC                   | 0.000        | 0.000        |
| LysoPE                   | 0.002        | 0.001        |
| <b>Total polar lipid</b> | <b>0.883</b> | <b>0.256</b> |

DGDG: **Digalactosyldiacylglycerol**  
 MGMG: **Monogalactosyl Monoacylglycerol**  
 PG: **Phosphatidylglycerol**  
 PC: **Phosphatidylcholine**  
 PI: **Phosphatidylinositol**  
 PS: **Phosphatidylserine**  
 PA: **Phosphatidic acids**  
 PE: **Phosphatidylethanolamine**  
 LysoPG: **Lysophosphatidylglycerol**  
 LysoPC: **Lysophosphatidylcholine**  
 LysoPE: **Lysophosphatidylethanolamine**

Supplementary table 2: Primers used for Real-time PCR

| Gene | Primers |                                 |
|------|---------|---------------------------------|
| GCLC | forward | 5'-ACATCTACCACGCAGTCAAGGACC-3'  |
|      | reverse | 5'-CTCAAGAACATCGCCTCCATTTCAG-3' |
| GCLM | forward | 5'-GCCCGCTCGCCATCTCTC-3'        |
|      | reverse | 5'-GTTGAGCAGGTTCCCGGTCT-3'      |
| NQO1 | forward | 5'-AGCGTTCGGTATTACGATCC-3'      |
|      | reverse | 5'-AGTACAATCAGGGCTCTTCTCG-3'    |
| HO-1 | forward | 5'-ACGCATATACCCGCTACCTG-3'      |
|      | reverse | 5'-CCAGAGTGTTTCATTTCGAGCA-3'    |
